# Supplementary material
Source: PubMed Central journal article supplement (PMC3421644)
Supplement: JVI.00645-12_zjv999096306so1.pdf [file JVI.00645-12_zjv999096306so1.pdf]

**Table1:** HCV1b NS5A FRET

| <b>Construct #</b> | <b>Construct Name</b>           |
|--------------------|---------------------------------|
| 1.                 | CFP-CCPGCC                      |
| 2.                 | CFP-CCRECC                      |
| 3.                 | CFP-CCCC                        |
| 4.                 | CFP-CCDAECC                     |
| 5.                 | CFP                             |
| 6.                 | CFP-NS5A                        |
| 7.                 | CFP-CCPGCC NS5A                 |
| 8.                 | NS5A (Thr213 CFP-CCPGCC)        |
| 9.                 | NS5A (Cys342 CFP-CCPGCC)        |
| 10.                | NS5A CFP-CCPGCC                 |
| 11.                | CCPGCC-NS5A-CFP                 |
| 12.                | NS5A (Thr213-CCPGCC)-CFP        |
| 13.                | NS5A (Cys342-CCPGCC)-CFP        |
| 14.                | NS5A (CCPGCC)-CFP               |
| 15.                | CFP-NS5A (Thr213-CCPGCC)        |
| 16.                | CFP-NS5A (Cys342-CCPGCC)        |
| 17.                | CFP-NS5A-CCPGCC                 |
| 18.                | NS5A-CFP                        |
| 19.                | NS5A-CCPGCC                     |
| 20.                | CCPGCC-NS5A                     |
| 21.                | NS5A (Thr213-CCPGCC)            |
| 22.                | NS5A (Cys342-CCPGCC)            |
| 23.                | CCPGCC-NS5A (Cys342-Cys447)-CFP |
